# Supplementary material for: Antibiotics in the Environment: Prescribing Risks to Non-Target Organisms
Source: MDPI journal article supplement (doi:10.3390/pollutants2040029), 2022-10-27
Supplement: s1 [file s1]

## Supplementary Files

### Antibiotics in the environment: prescribing risks to non-target organisms

Livia da Silva Freitas, Laiz Coutelle Honscha, Lisiane Martins Volcão, Rodrigo de Lima Brum, Flavio Manoel Rodrigues da Silva Júnior, Daniela Fernandes Ramos\*

**Table S1.** Average germination percentage of *L. sativa* seeds exposed to different cephalosporins. \*indicates significance at the  $p < 0.05$  level compared to the control; \*\*indicates significance at the  $p < 0.01$  level compared to the control; \*\*\*indicates significance at the  $p < 0.001$  level compared to the control.

|                         | Cephalothin        | Cefazolin | Ceftazidime | Ceftriaxone | Cefepime |
|-------------------------|--------------------|-----------|-------------|-------------|----------|
| Concentration<br>(mg/L) |                    |           |             |             |          |
| 0                       | -----86.7±6.1----- |           |             |             |          |
| 25                      | 85.3±6.7           | 90.7±3.5  | 84.0±4.6    | 92.0±4.6    | 89.3±2.7 |
| 50                      | 80.0±6.1           | 93.3±1.3  | 80.0±2.3    | 90.7±3.5    | 82.3±2.7 |
| 100                     | 85.3±4.8           | 90.7±3.5  | 89.3±1.3    | 89.3±3.5    | 92.0±2.3 |
| 250                     | 77.3±2.7           | 82.7±7.4  | 81.3±1.3    | 83.7±7.4    | 89.3±4.8 |
| 500                     | 81.3±9.6           | 30.7*±3.5 | 0*          | 0*          | 0*       |

**Table S2.** Wet weight of *L. sativa* seedlings exposed to different cephalosporins. \*indicates significance at the  $p < 0.05$  level compared to the control; \*\*indicates significance at the  $p < 0.01$  level compared to the control; \*\*\*indicates significance at the  $p < 0.001$  level compared to the control.

| Concentration<br>(mg/L) | Cephalothin          | Cefazolin       | Ceftazidime   | Ceftriaxone   | Cefepime      |
|-------------------------|----------------------|-----------------|---------------|---------------|---------------|
| 0                       | -----0.395±0.05----- |                 |               |               |               |
| 25                      | 0.360±0.05           | 0.356±0.02      | 0.434±0.05    | 0.360±0.03    | 0.303*±0.02   |
| 50                      | 0.305±0.02           | 0.260**±0.02    | 0.332±0.03    | 0.344±0.02    | 0.259**±0.01  |
| 100                     | 0.316±0.06           | 0.218***±0.03   | 0.346±0.02    | 0.339±0.03    | 0.213***±0.03 |
| 250                     | 0.297±0.02           | 0.142***±0.05   | 0.182***±0.02 | 0.138***±0.04 | 0.155***±0.02 |
| 500                     | 0.296±0.04           | 0.0280***±0.006 | 0.000***      | 0.000***      | 0.000***      |

**Table S3.** Dry weight of *L. sativa* seedlings exposed to different cephalosporins. \*indicates significance at the  $p < 0.05$  level compared to the control; \*\*indicates significance at the  $p < 0.01$  level compared to the control; \*\*\*indicates significance at the  $p < 0.001$  level compared to the control.

| Concentration<br>(mg/L) | Cephalothin            | Cefazolin      | Ceftazidime  | Ceftriaxone  | Cefepime      |
|-------------------------|------------------------|----------------|--------------|--------------|---------------|
| 0                       | -----0.016±0.0004----- |                |              |              |               |
| 25                      | 0.022*±0.001           | 0.016±0.0004   | 0.016±0.001  | 0.014±0.0006 | 0.013±0.001   |
| 50                      | 0.021*±0.001           | 0.017±0.001    | 0.014±0.001  | 0.014±0.002  | 0.013±0.0008  |
| 100                     | 0.021*±0.002           | 0.016±0.001    | 0.015±0.0003 | 0.015±0.002  | 0.020±0.003   |
| 250                     | 0.021*±0.001           | 0.015±0.002    | 0.016±0.0005 | 0.020±0.0006 | 0.021*±0.0002 |
| 500                     | 0.021*±0.001           | 0.005***±0.001 | 0.0***       | 0.0***       | 0.0***        |
